# Supplementary material for: Anthracene-based ferrocenylselenoethers: syntheses, crystal structures, Cu(i) complexes and sensing property
Source: Royal Society of Chemistry journal article supplement (doi:10.1039/c5ra06591g), 2015-01-01
Supplement: c5ra06591g1.pdf [file c5ra06591g1.pdf]

1 **Anthracene-based ferrocenylselenoethers: syntheses, crystal structures, Cu(I) complexes and sensing property**

2 Yu-Qing Liu<sup>a</sup>, Wei Ji<sup>a,b</sup>, Hai-Yan Zhou<sup>a</sup>, Yu Li<sup>a</sup>, Su Jing<sup>\*,a</sup>, Dun-Ru Zhu<sup>\*,b</sup>, Jian Zhang<sup>c</sup>

3

4 <sup>a</sup>College of Sciences, Nanjing Tech University, Nanjing 211816, P.R. China. E-mail: [sjing@njtech.edu.cn](mailto:sjing@njtech.edu.cn).

5 <sup>b</sup>College of Chemistry and Chemical Engineering, Nanjing Tech University, Nanjing 210009, P.R. China. E-mail: [zhudr@njtech.edu.cn](mailto:zhudr@njtech.edu.cn).

6 <sup>c</sup>Laboratory of Translational Medicine, Jiangsu Province Academy of Traditional Chinese Medicine, Nanjing 210028, P.R. China.

7

8 **Table of contents**

9

10 **Fig. S1:** <sup>1</sup>H NMR spectrum of **L3**, CDCl<sub>3</sub>, 298 K.

11 **Fig. S2:** <sup>1</sup>H NMR spectrum of **L4**, CDCl<sub>3</sub>, 298 K.

12 **Fig. S3:** <sup>1</sup>H NMR spectrum of **L5**, CDCl<sub>3</sub>, 298 K.

13 **Fig. S4:** MALDI-TOF Spectrum of **L3**

14 **Fig. S5:** MALDI-TOF Spectrum of **L4**

15 **Fig. S6:** ESI-MS spectrum of **L5**

16 **Fig. S7:** Fluorescence spectra change of **L3** ( $1 \times 10^{-4}$  M) in a CH<sub>2</sub>Cl<sub>2</sub> solution upon addition of various metal ions.

17 **Fig. S8:** Fluorescence spectra change of **L4** ( $1 \times 10^{-4}$  M) in a CH<sub>2</sub>Cl<sub>2</sub> solution upon addition of various metal ions.

18 **Fig. S9:** UV/vis spectra changes of receptor **L3** ( $1 \times 10^{-4}$  M) in a CH<sub>2</sub>Cl<sub>2</sub> solution upon the addition of various metal ions.

19 **Fig. S10:** UV/vis spectra changes of receptor **L4** ( $1 \times 10^{-4}$  M) in a CH<sub>2</sub>Cl<sub>2</sub> solution upon the addition of various metal ions.

20 **Fig. S11:** UV/vis spectra changes of receptor **L5** ( $1 \times 10^{-4}$  M) in a CH<sub>2</sub>Cl<sub>2</sub> solution upon the addition of various metal ions.

21 **Fig.S12:** Absorbance of **L5** at different concentrations of Zn<sup>2+</sup> added, normalized between the minimum absorbance and the maximum  
22 absorbance intensity. The detection limit was determined to be  $6.62 \times 10^{-6}$  M.

23 **Fig.S13:** Benesi-Hilderbrand plot of **L5** with Zn(ClO<sub>4</sub>)<sub>2</sub>.

24 **Fig.S14:** Absorbance of **L5** at different concentrations of  $\text{Cu}^{2+}$  added, normalized between the minimum absorbance and the maximum  
25 absorbance intensity. The detection limit was determined to be  $5.26 \times 10^{-5} \text{M}$ .

26 **Fig.S15:** Benesi-Hilderbrand plot of **L5** with  $\text{Cu}(\text{ClO}_4)_2$ .

27 **Fig.S16:** Cyclic voltammogram of **L3** (black line) in  $\text{CH}_3\text{CN}/\text{CH}_2\text{Cl}_2$  (1:1, v/v) solution upon addition of excess  $\text{Cu}(\text{ClO}_4)_2$  (red line) and  
28  $\text{Hg}(\text{ClO}_4)_2$  (green line).

29 **Fig.S17:** Cyclic voltammogram of **L4** (black line) in  $\text{CH}_3\text{CN}/\text{CH}_2\text{Cl}_2$  (1:1, v/v) solution upon addition of excess  $\text{Cu}(\text{ClO}_4)_2$  (red line) and  
30  $\text{Hg}(\text{ClO}_4)_2$  (green line).

31 **Fig.S18:** Cyclic voltammogram of **L5** (black line) in  $\text{CH}_3\text{CN}/\text{CH}_2\text{Cl}_2$  (1:1, v/v) solution upon addition of excess  $\text{Cu}(\text{ClO}_4)_2$  (red line),  $\text{Zn}(\text{ClO}_4)_2$   
32 (blue line) and  $\text{Hg}(\text{ClO}_4)_2$  (green line).

33 **Fig.S19:** IR spectrum of **L5**

34 **Fig.S20:** IR spectrum of **L5** with excess  $\text{Cu}(\text{ClO}_4)_2$

35 **Fig.S21:** IR spectrum of **L5** with excess  $\text{Zn}(\text{ClO}_4)_2$

36 **Fig.S22:** IR spectrum of **L5** with excess  $\text{Hg}(\text{ClO}_4)_2$

37 **Table S1:** Selected Bond Lengths ( $\text{\AA}$ ) and Bond Angles ( $^\circ$ ) for **L3-L5**

38 **Table S2.** Selected Bond Lengths ( $\text{\AA}$ ) and Bond Angles ( $^\circ$ ) for **1-4**

39

40

41

42

44 **Fig. S1:**  $^1\text{H}$  NMR spectrum of L3,  $\text{CDCl}_3$ , 298 K.

45

46

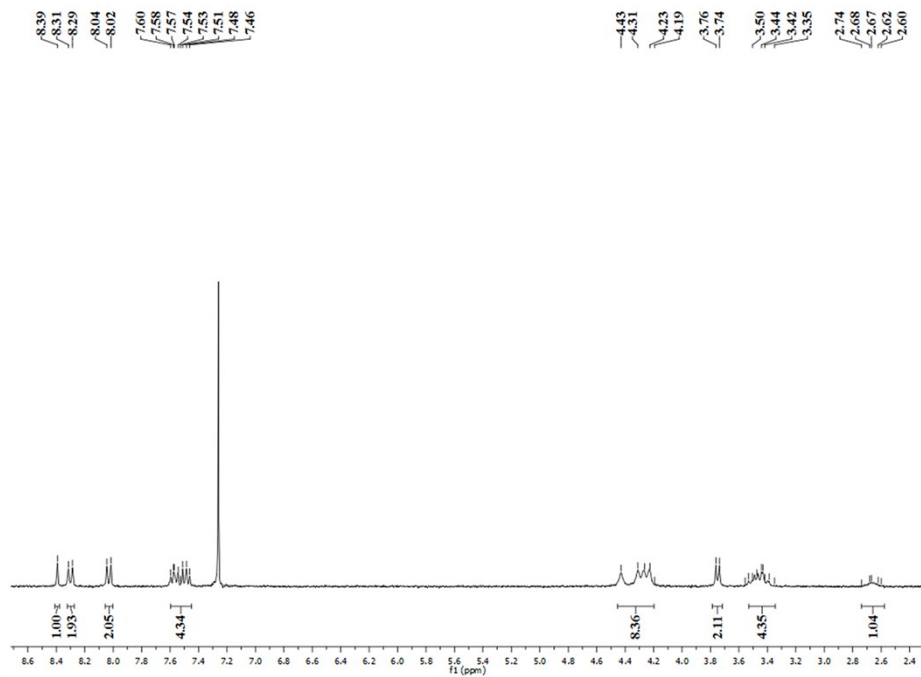

47

48

50 **Fig. S2:**  $^1\text{H}$  NMR spectrum of **L4**,  $\text{CDCl}_3$ , 298 K.

51

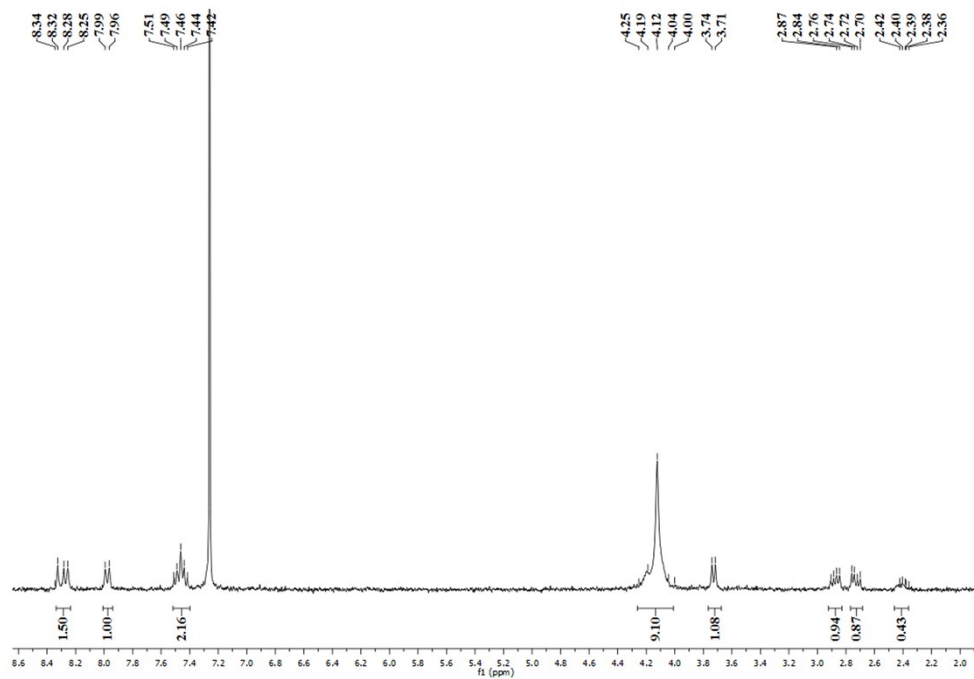

52

54 **Fig. S3:**  $^1\text{H}$  NMR spectrum of **L5**,  $\text{CDCl}_3$ , 298 K.

55

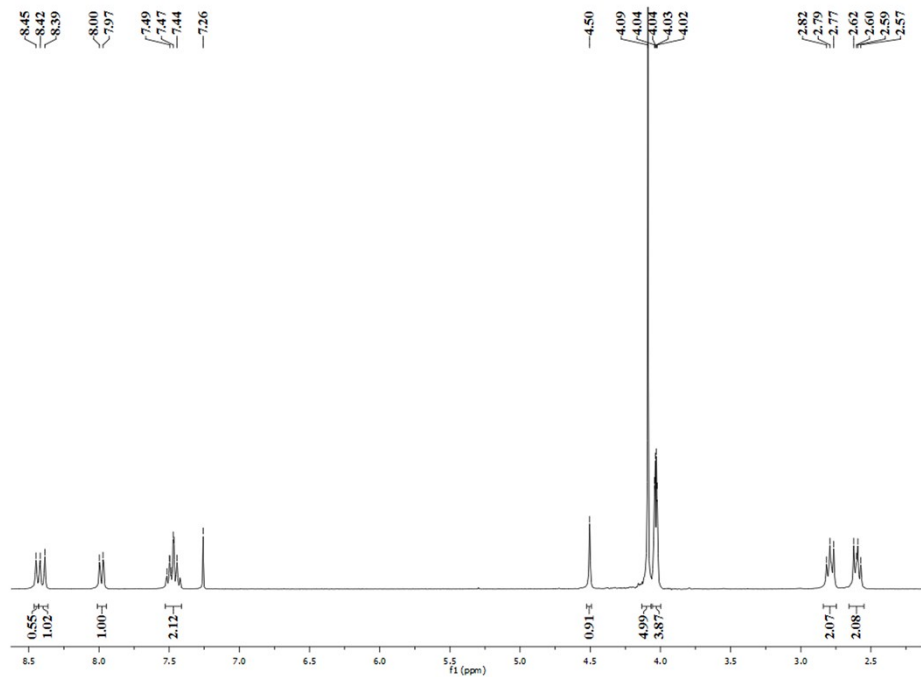

56

57

58

60 **Fig. S4: MALDI-TOF Spectrum of L3**

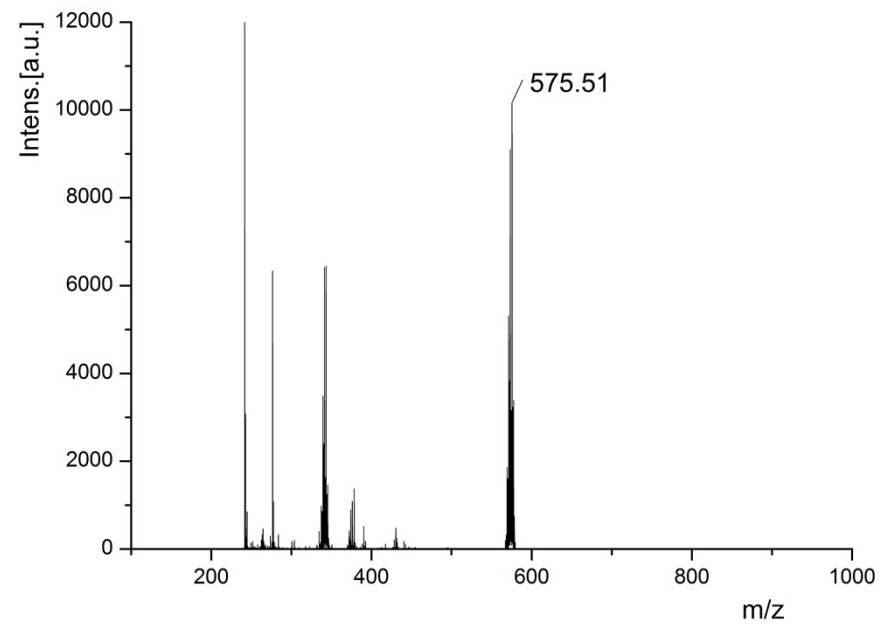

61  
62  
63  
64  
65  
66  
67  
68  
69

71 **Fig. S5: MALDI-TOF Spectrum of L4**

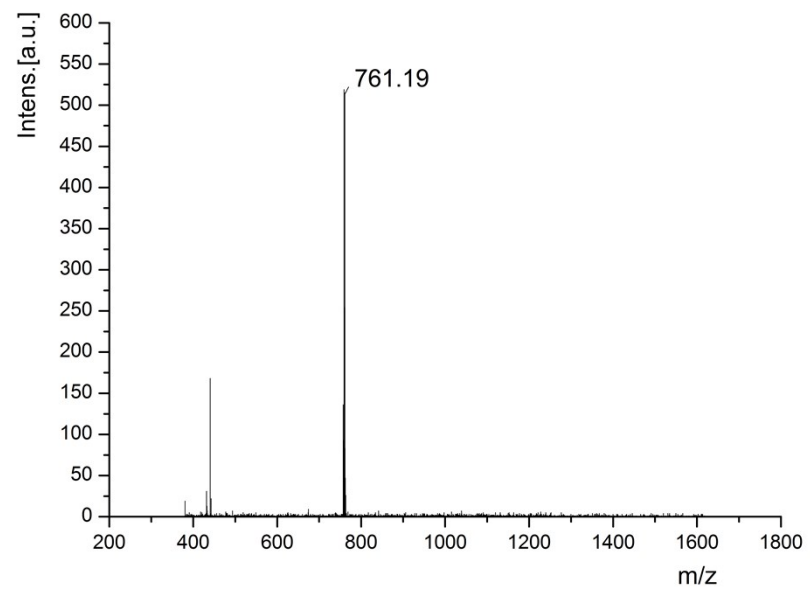

72  
73  
74

76 **Fig. S6: ESI-MS spectrum of L5**

77

D:\test\2013-1\Ngd\Jel\LYF1 3/29/2013 8:46:11 AM

LYF1 #9-33 RT: 0.04-0.16 AV: 25 NL: 1.20E3  
T: ITMS + p ESI Full ms [200.00-2000.00]

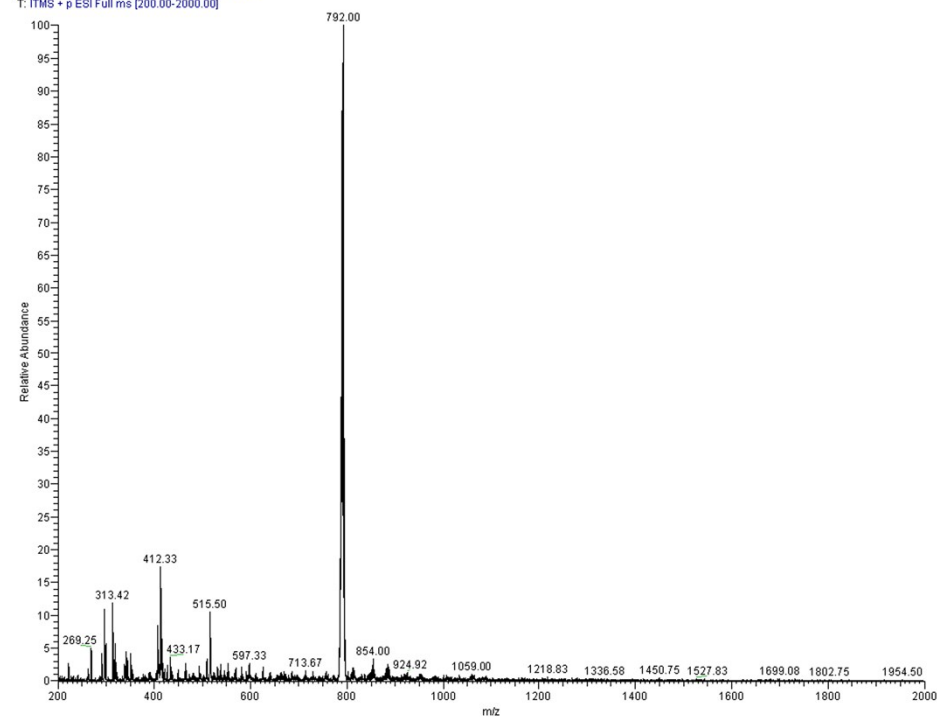

78

79

80

81

82

83

84

85

86



87

88 **Fig. S7:** Fluorescence spectra change of **L3** ( $1 \times 10^{-4}$  M) in a  $\text{CH}_2\text{Cl}_2$  solution upon addition of various metal ions.

89

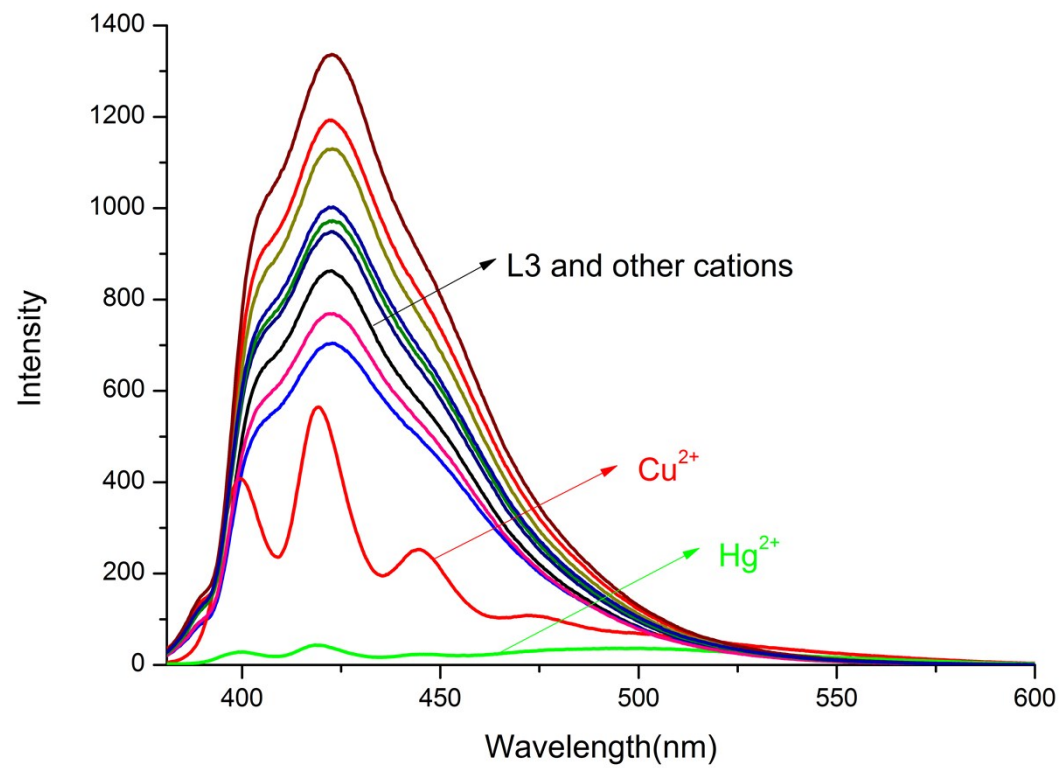

90

91

93 **Fig. S8:** Fluorescence spectra change of **L4** ( $1 \times 10^{-4}$  M) in a  $\text{CH}_2\text{Cl}_2$  solution upon addition of various metal ions  
94  
95

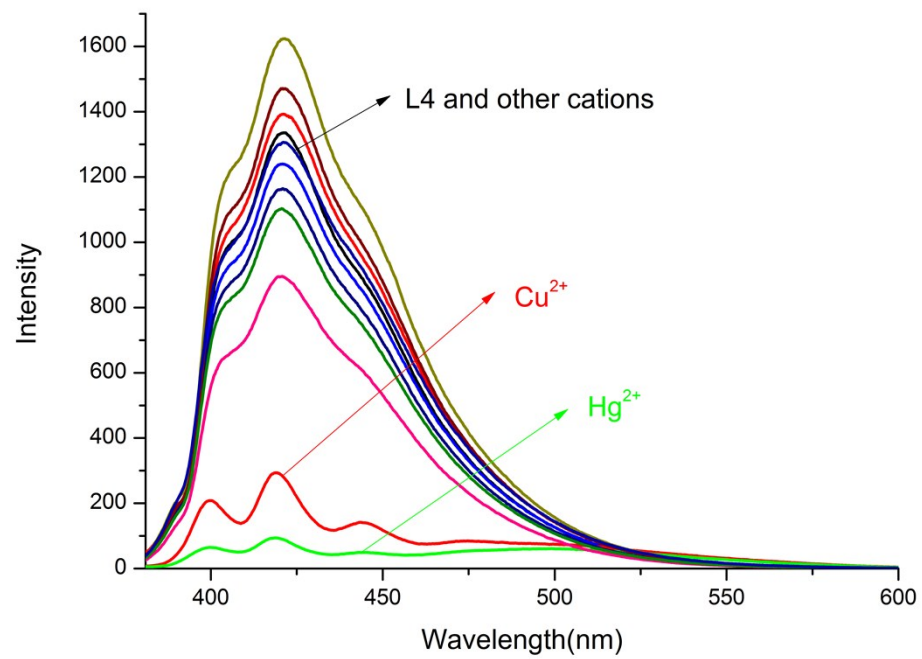

97 **Fig. S9:** UV/vis spectra changes of receptor **L3** ( $1 \times 10^{-4}$  M) in a  $\text{CH}_2\text{Cl}_2$  solution upon the addition of various metal ions.

98

99

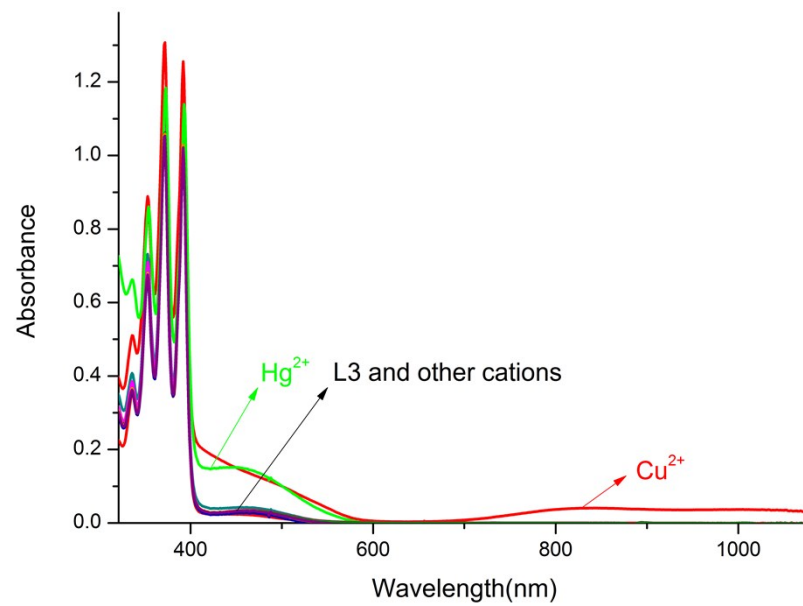

100

102 **Fig. S10:** UV/vis spectra changes of receptor **L4** ( $1 \times 10^{-4}$  M) in a  $\text{CH}_2\text{Cl}_2$  solution upon the addition of various metal ions.

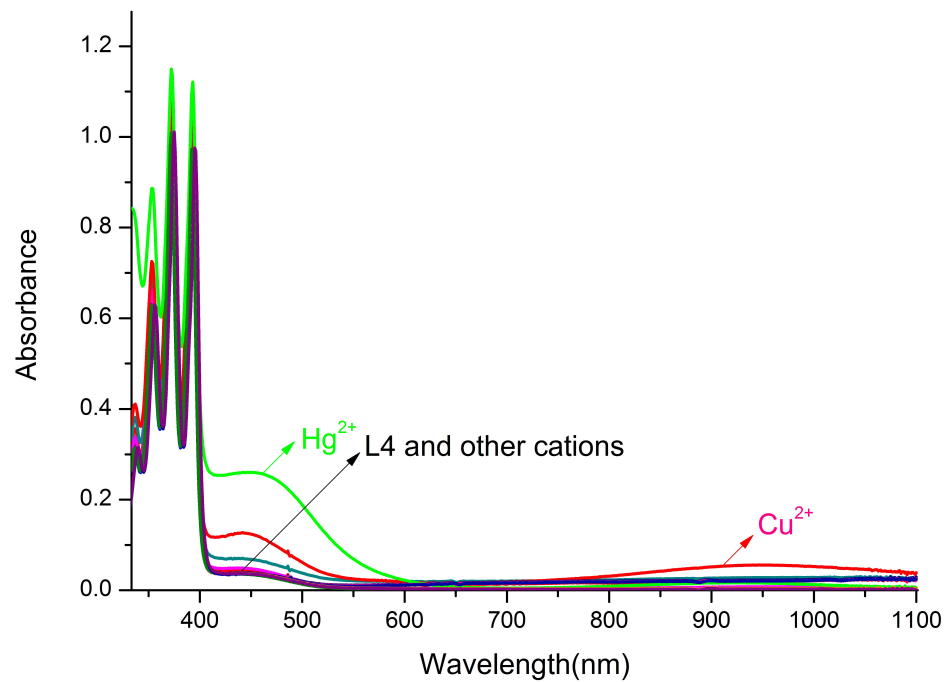

103  
104  
105  
106  
107  
108

110 **Fig. S11:** UV/vis spectra changes of receptor **L5** ( $1 \times 10^{-4}$  M) in a  $\text{CH}_2\text{Cl}_2$  solution upon the addition of various metal ions.  
111

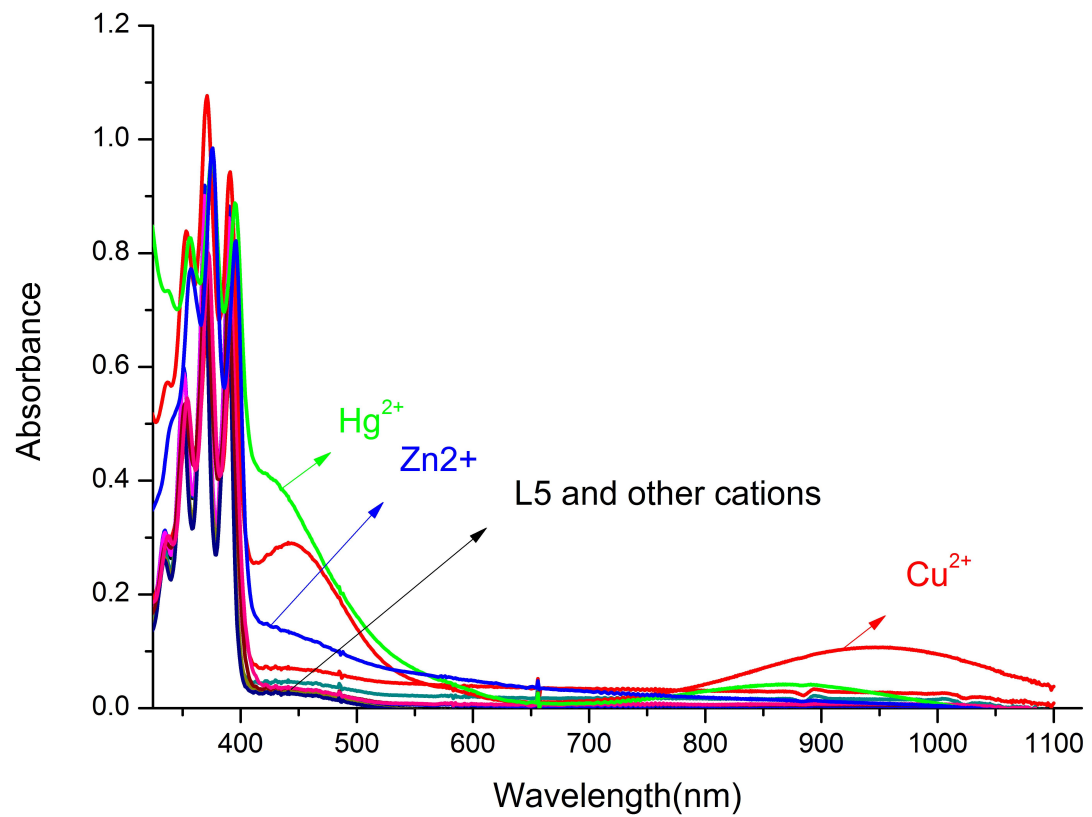

112  
113  
114

116 **Fig.S12:** Absorbance of **L5** at different concentrations of  $\text{Zn}^{2+}$  added, normalized between the minimum absorbance and the maximum  
117 absorbance intensity. The detection limit was determined to be  $6.62 \times 10^{-6}$  M.  
118

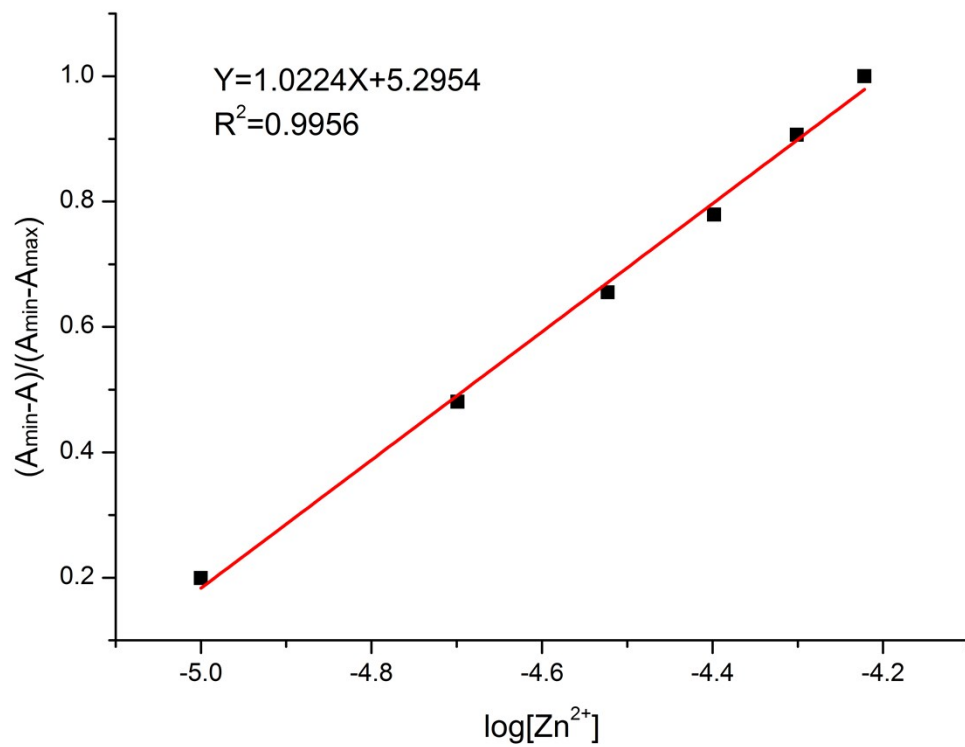

122 **Fig.S13:** Benesi-Hilderbrand plot of **L5** with  $\text{Zn}(\text{ClO}_4)_2$ .

123

124

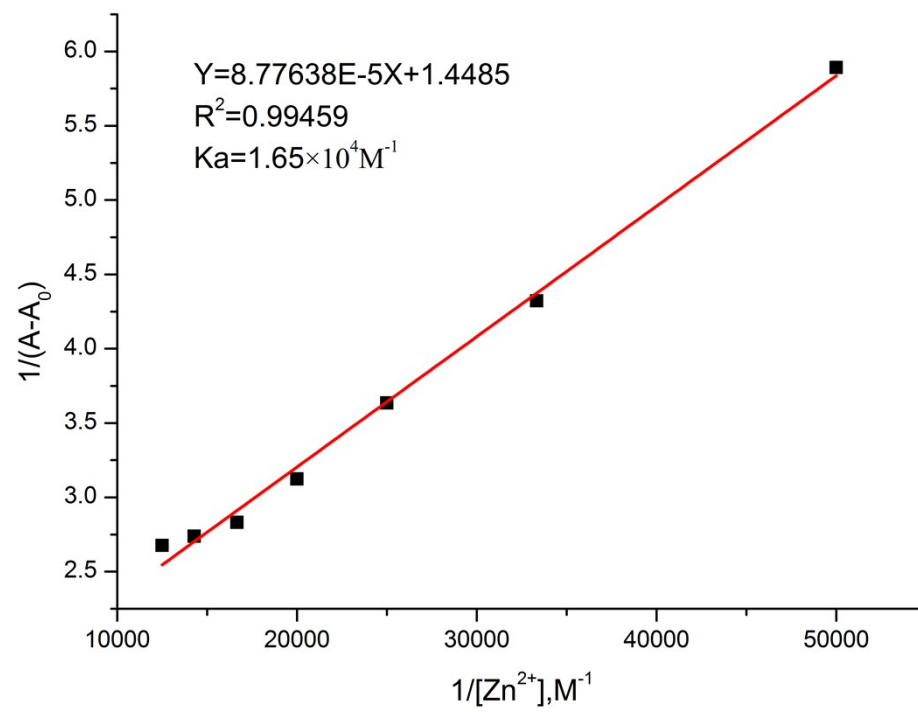

125

127 **Fig.S14:** Absorbance of **L5** at different concentrations of  $\text{Cu}^{2+}$  added, normalized between the minimum absorbance and the maximum  
128 absorbance intensity. The detection limit was determined to be  $5.26 \times 10^{-5} \text{M}$ .

129

130

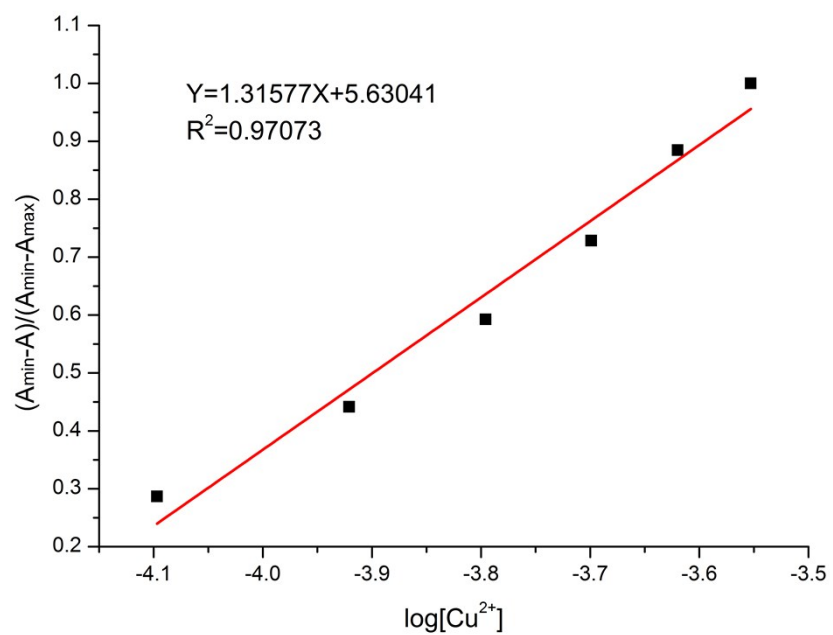

131

132

133

134

135



137 **Fig.S15:** Benesi-Hilderbrand plot of **L5** with  $\text{Cu}(\text{ClO}_4)_2$ .

138

139

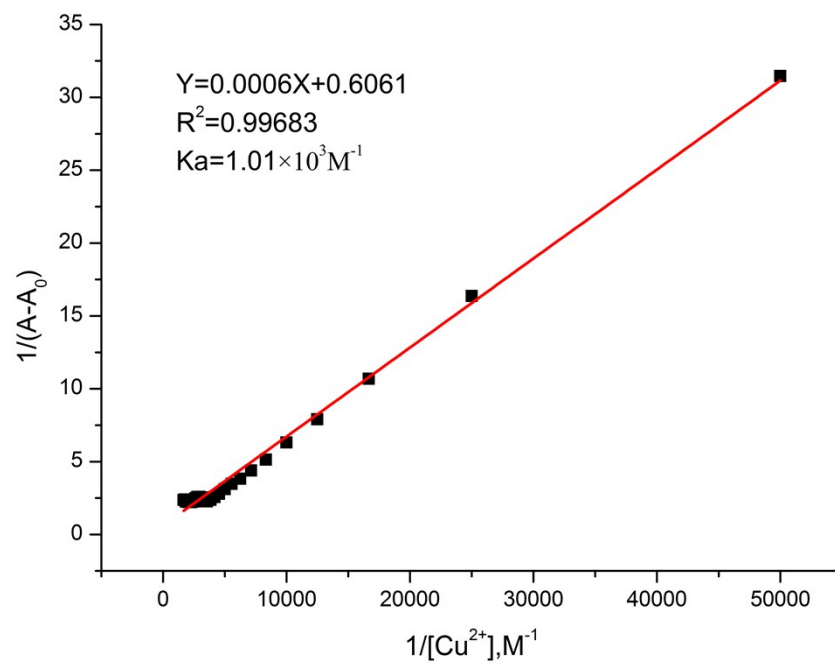

140

142 **Fig. S16:** Cyclic voltammogram of **L3** (black line) in CH<sub>3</sub>CN/CH<sub>2</sub>Cl<sub>2</sub> (1:1, v/v) solution upon addition of excess Cu(ClO<sub>4</sub>)<sub>2</sub> (red line) and  
143 Hg(ClO<sub>4</sub>)<sub>2</sub> (green line).  
144

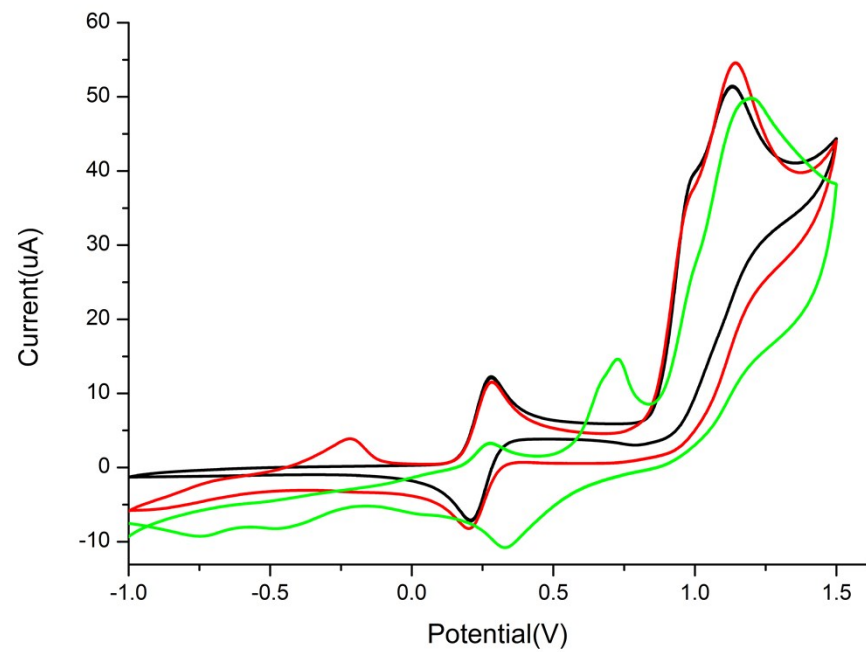

145  
146  
147

149 **Fig. S17:** Cyclic voltammogram of **L4** (black line) in CH<sub>3</sub>CN/CH<sub>2</sub>Cl<sub>2</sub> (1:1, v/v) solution upon addition of excess Cu(ClO<sub>4</sub>)<sub>2</sub> (red line) and  
150 Hg(ClO<sub>4</sub>)<sub>2</sub> (green line).

151

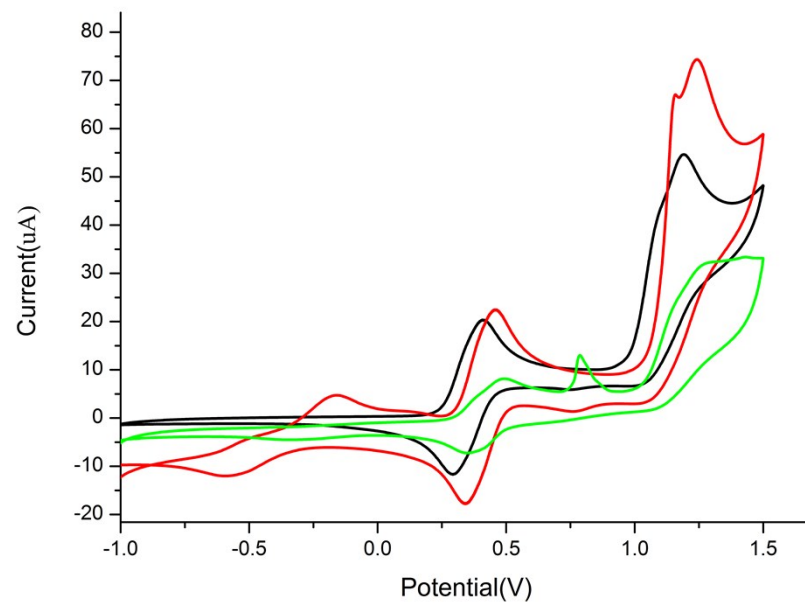

152  
153  
154  
155  
156  
157  
158

160 **Fig.S18:** Cyclic voltammogram of **L5** (black line) in  $\text{CH}_3\text{CN}/\text{CH}_2\text{Cl}_2$  (1:1, v/v) solution upon addition of excess  $\text{Cu}(\text{ClO}_4)_2$  (red line),  $\text{Zn}(\text{ClO}_4)_2$   
161 (blue line) and  $\text{Hg}(\text{ClO}_4)_2$  (green line).

162

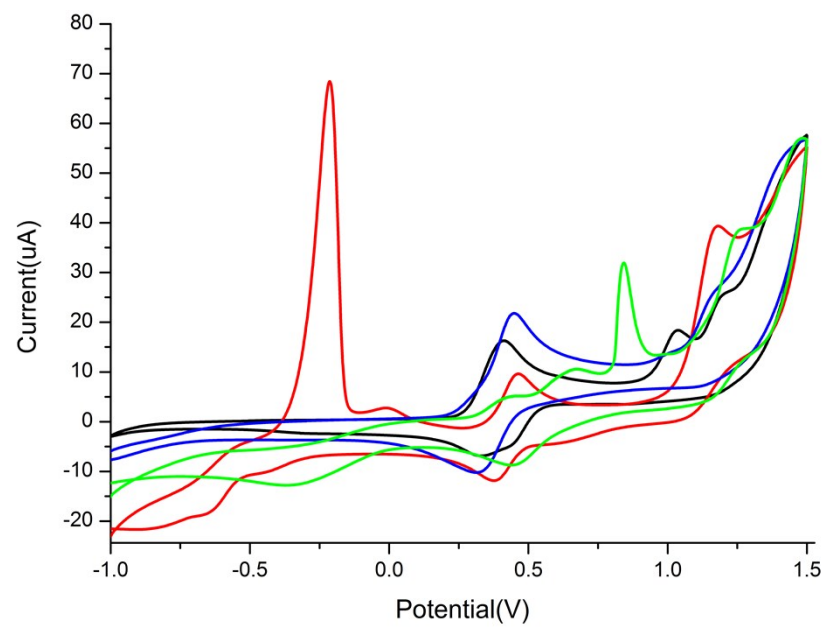

163

165 **Fig.S19:** IR spectrum of L5

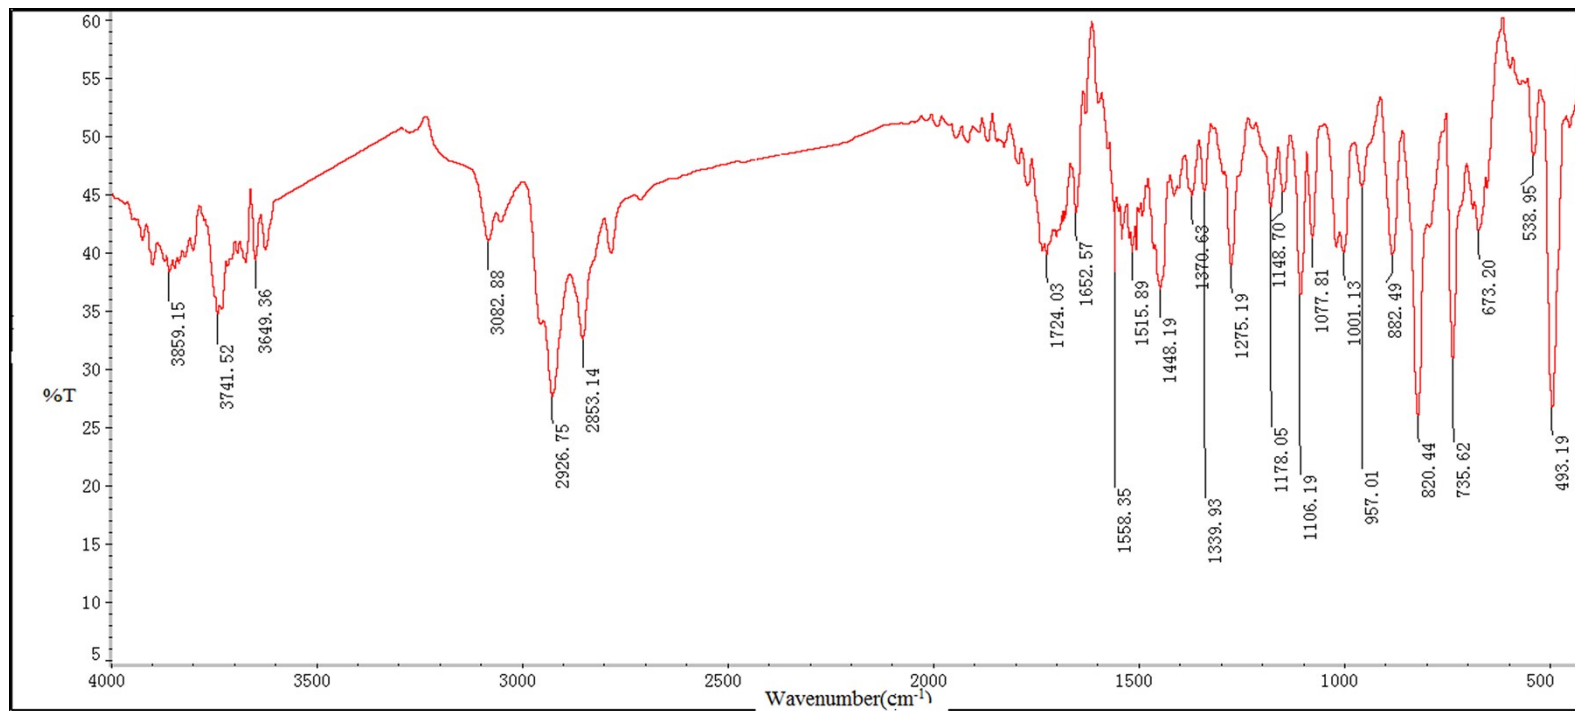

168 **Fig.S20:** IR spectrum of **L5** with excess  $\text{Cu}(\text{ClO}_4)_2$

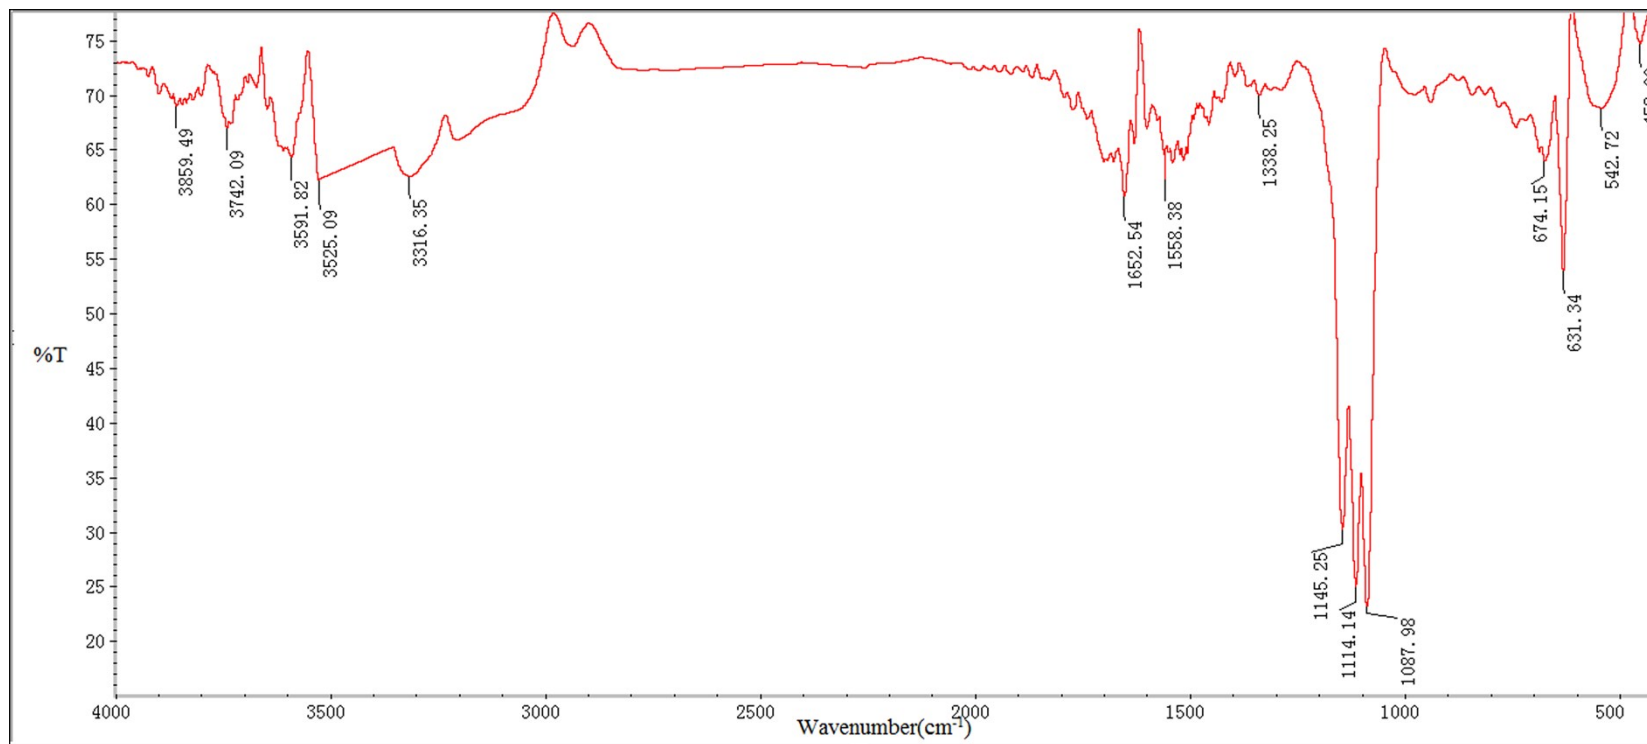

169

171 **Fig.S21:** IR spectrum of **L5** with excess  $\text{Zn}(\text{ClO}_4)_2$

172

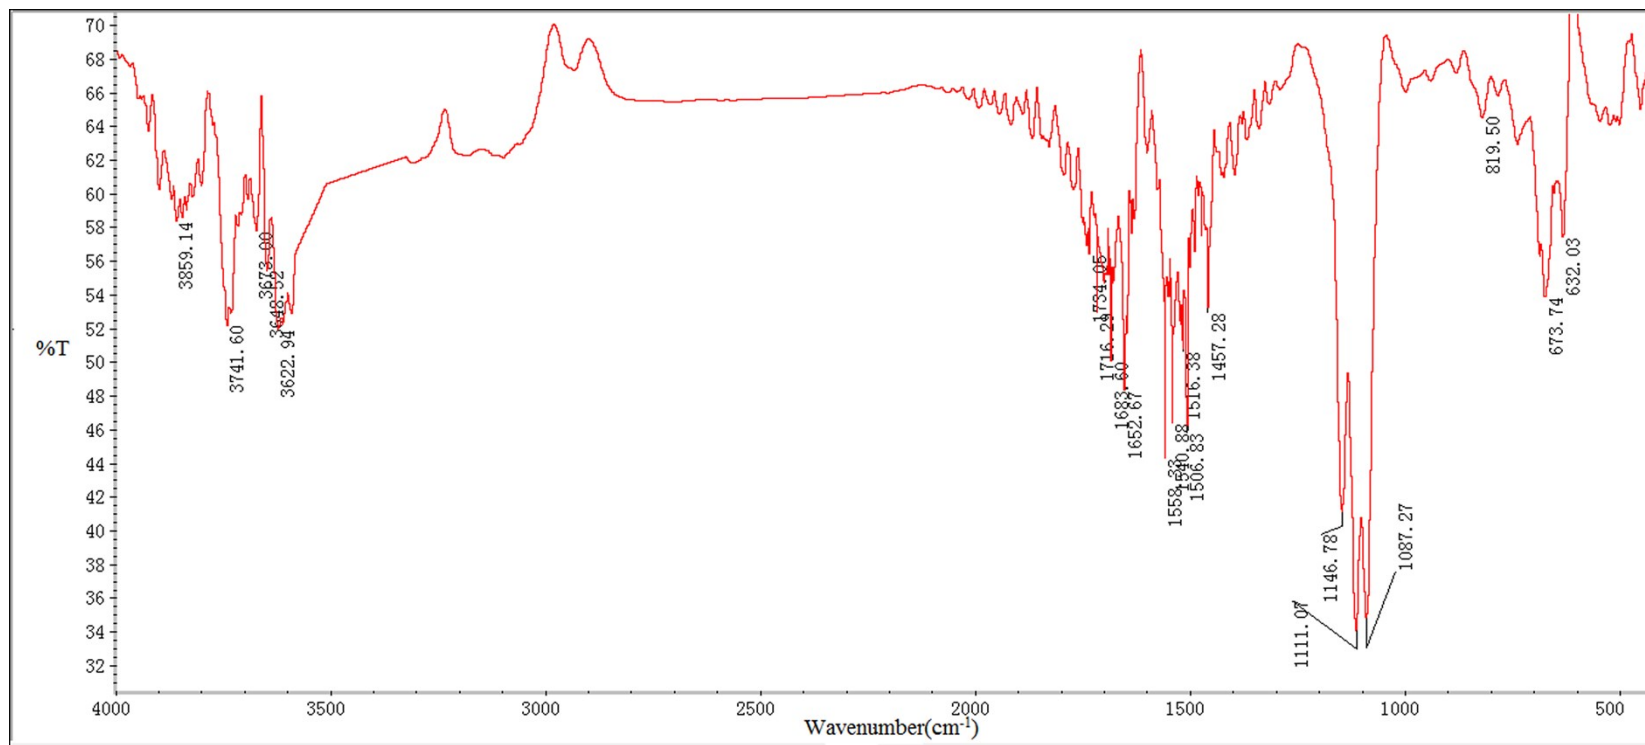

173

175 **Fig.S22:** IR spectrum of **L5** with excess  $\text{Hg}(\text{ClO}_4)_2$

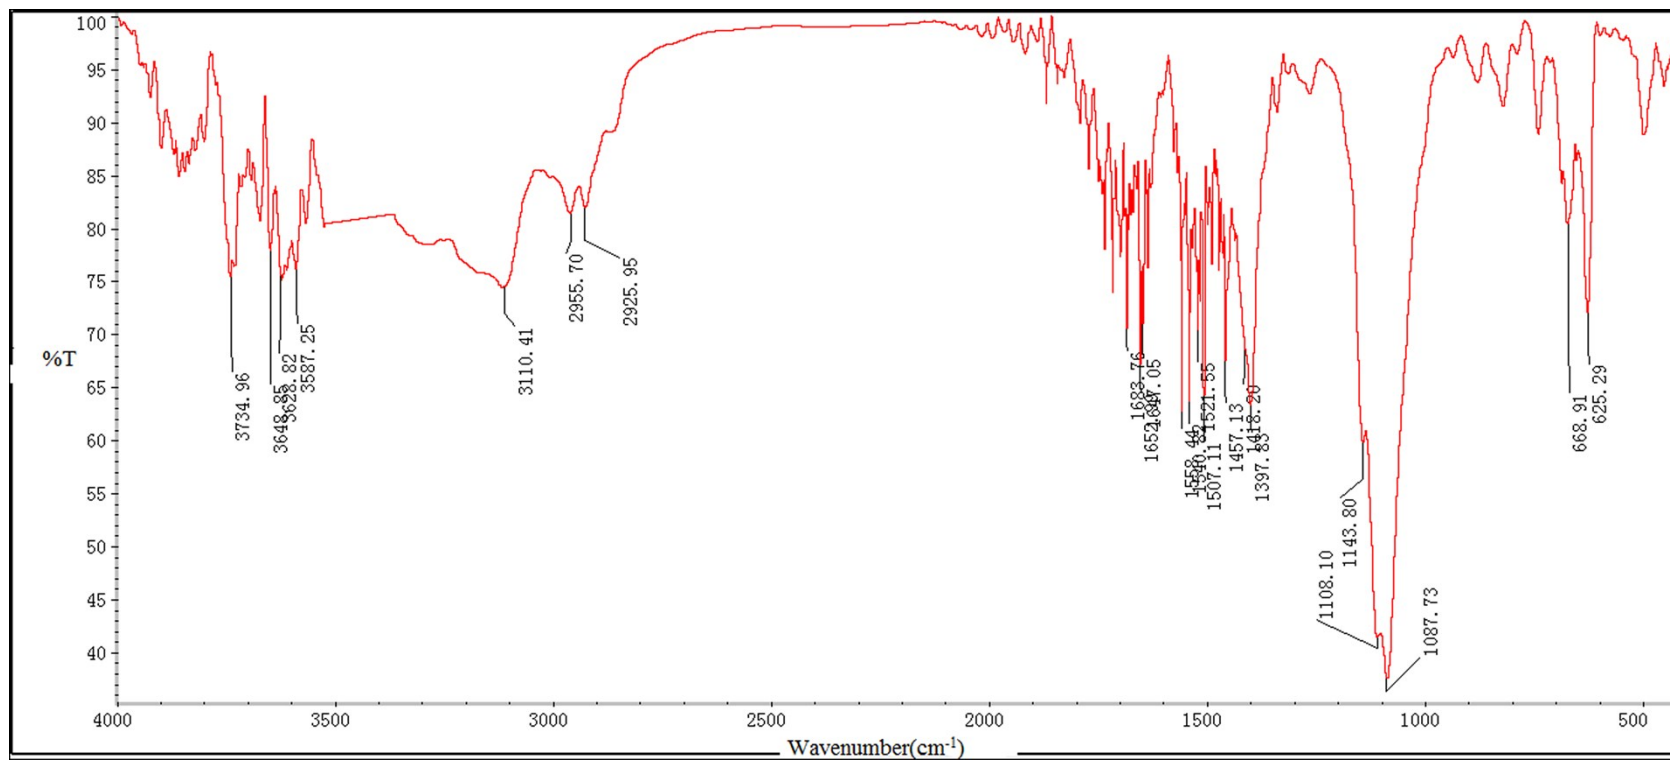

176



178 **Table S1:** Selected Bond Lengths (Å) and Bond Angles (°) for **L3-L5**

179

| <b>L3</b>  |          | <b>L4</b>   |           | <b>L5</b>   |          |
|------------|----------|-------------|-----------|-------------|----------|
| Se1-C1     | 1.898(5) | Se1-C11     | 1.902(4)  | Se1-C1      | 1.907(4) |
| Se1-C11    | 1.966(6) | Se1-C23     | 1.958(4)  | Se1-C21     | 1.968(4) |
| Se2-C6     | 1.912(5) | Se2-C1      | 1.902(3)  | Se2-C11     | 1.913(4) |
| Se2-C13    | 1.954(5) | Se2-C21     | 1.974(4)  | Se2-C24     | 1.969(9) |
|            |          |             |           | N1-C25      | 1.463(4) |
|            |          |             |           | N1-C22      | 1.470(4) |
|            |          |             |           | N1-C23      | 1.478(4) |
| C1-Se1-C11 | 97.3(2)  | C11-Se1-C23 | 100.53(2) | C1-Se1-C21  | 98.85(2) |
| C6-Se2-C13 | 104.4(2) | C1-Se2-C21  | 97.64(2)  | C11-Se2-C24 | 94.45(2) |
|            |          |             |           | C25-N1-C22  | 110.8(3) |
|            |          |             |           | C25-N1-C23  | 111.4(3) |
|            |          |             |           | C22-N1-C23  | 113.8(3) |

180

181 **Table S2:** Selected Bond Lengths (Å) and Bond Angles (°) for **1-4**

182

|              | <b>1</b>  | <b>2</b>       | <b>3</b>  | <b>4</b>    |           |            |           |
|--------------|-----------|----------------|-----------|-------------|-----------|------------|-----------|
| Se1-C1       | 1.904(4)  | Se1-C1         | 1.896(4)  | Se1-C1      | 1.906(1)  | Se1-C18    | 1.888(7)  |
| Se1-C11      | 1.967(4)  | Se1-C11        | 1.984(5)  | Se1-C11     | 1.962(1)  | Se1-C17    | 1.975(6)  |
| Se2-C6       | 1.915(4)  | Se2-C6         | 1.902(5)  | Se2-C6      | 1.914(9)  | Se2-C30    | 1.878(7)  |
| Se2-C27      | 1.962(4)  | Se2-C27        | 1.971(5)  | Se2-C13     | 1.967(1)  | Se2-C29    | 1.964(7)  |
| Cu-Cu#1      | 2.793(1)  | Cu1-Cu1#1      | 2.782(1)  | Cu1-Cu2     | 2.612(2)  | Se1-Cu1    | 2.436(1)  |
| Se1-Cu       | 2.433(7)  | Se1-Cu1        | 2.454(8)  | Se1-Cu1     | 2.430(2)  | Se2-Cu2#1  | 2.415(1)  |
| Se2-Cu       | 2.436(7)  | Se2-Cu1        | 2.451(8)  | Se2-Cu1     | 2.444(2)  | Se3-Cu3    | 2.433(1)  |
| Br-Cu        | 2.452(7)  | I1-Cu1         | 2.602(7)  | Se3-Cu2     | 2.430(2)  | Se4-Cu4#2  | 2.428(1)  |
| Br-Cu#1      | 2.492(7)  | I1-Cu1#1       | 2.627(8)  | Se4-Cu2     | 2.433(2)  | Cu2-Se2#1  | 2.415(1)  |
| Cu-Br#1      | 2.492(7)  | Cu1-I1#1       | 2.627(8)  | I2-Cu1      | 2.566(2)  | Cu4-Se4#2  | 2.428(1)  |
|              |           |                |           | I2-Cu2      | 2.663(2)  | Cu1-Cu3    | 2.768(2)  |
|              |           |                |           | I1-Cu2      | 2.557(2)  | Cu1-Cu4    | 2.886(2)  |
|              |           |                |           | I1-Cu1      | 2.638(2)  | Cu1-Cu2    | 2.811(2)  |
| Se1-Cu-Se2   | 114.55(2) | Se2-Cu1-Se1    | 112.40(3) | Se1-Cu1-Se2 | 99.72(6)  | Cu2-Cu3    | 2.788(2)  |
| Se1-Cu-Br    | 109.77(3) | Se1-Cu1-I1     | 105.49(3) | Se1-Cu1-I2  | 115.81(7) | Cu2-Cu4    | 2.752(1)  |
| Se2-Cu-Br    | 109.23(2) | Se2-Cu1-I1#1   | 103.24(3) | Se2-Cu1-I2  | 112.76(6) | Cu3-Cu4    | 2.893(2)  |
| Se1-Cu-Br#1  | 109.86(3) | Se1-Cu1-I1#1   | 110.27(3) | Se1-Cu1-Cu2 | 129.31(8) | I1-Cu1     | 2.646(8)  |
| Se2-Cu-Br#1  | 102.03(2) | Se2-Cu1-I1#1   | 103.24(3) | Se2-Cu1-Cu2 | 129.04(7) | I1-Cu2     | 2.656(1)  |
| Br-Cu-Br#1   | 111.21(2) | I1-Cu1-I1#1    | 115.71(2) | I2-Cu1-Cu2  | 61.88(4)  | I1-Cu3     | 2.705(1)  |
| Se1-Cu-Cu#1  | 126.87(3) | Se1-Cu1-Cu1#1  | 125.23(4) | Se1-Cu1-I1  | 100.35(6) | I2-Cu4     | 2.653(1)  |
| Se2-Cu-Cu#1  | 118.37(3) | Se2-Cu1-Cu1#1  | 122.35(3) | Se2-Cu1-I1  | 105.43(6) | I2-Cu1     | 2.691(1)  |
| Br-Cu-Cu#1   | 56.27(2)  | I1-Cu1-Cu1#1   | 58.30(2)  | I2-Cu1-I1   | 120.14(6) | I2-Cu2     | 2.777(9)  |
| Br#1-Cu-Cu#1 | 54.94(2)  | I1#1-Cu1-Cu1#1 | 57.41(2)  | Cu2-Cu1-I1  | 58.29(4)  | I3-Cu2     | 2.601(1)  |
|              |           |                |           | Se3-Cu2-Se4 | 99.34(6)  | I3-Cu3     | 2.698(1)  |
|              |           |                |           | Se3-Cu2-I1  | 116.87(7) | I3-Cu4     | 2.770(9)  |
|              |           |                |           | Se4-Cu2-I1  | 115.09(7) | I4-Cu3     | 2.631(8)  |
|              |           |                |           | Se3-Cu2-Cu1 | 129.65(7) | I4-Cu4     | 2.680(1)  |
|              |           |                |           | Se4-Cu2-Cu1 | 128.16(7) | I4-Cu1     | 2.697(1)  |
|              |           |                |           | I1-Cu2-Cu1  | 61.36(4)  | Se1-Cu1-I1 | 110.34(4) |
|              |           |                |           | Se3-Cu2-I2  | 102.47(6) | Se1-Cu1-I2 | 102.11(3) |
|              |           |                |           | Se4-Cu2-I2  | 100.35(6) | I1-Cu1-I2  | 111.83(3) |

183

|  |            |           |              |           |
|--|------------|-----------|--------------|-----------|
|  | I1-Cu2-I2  | 119.54(6) | Se1-Cu1-I4   | 110.88(4) |
|  | Cu1-Cu2-I2 | 58.21(4)  | I1-Cu1-I4    | 113.79(3) |
|  |            |           | I2-Cu1-I4    | 107.24(3) |
|  |            |           | Se2#1-Cu2-I3 | 114.01(4) |
|  |            |           | Se2#1-Cu2-I1 | 109.93(4) |
|  |            |           | I3-Cu2-I1    | 111.85(3) |
|  |            |           | Se2#1-Cu2-I2 | 95.42(3)  |
|  |            |           | I3-Cu2-I2    | 115.59(3) |
|  |            |           | I1-Cu2-I2    | 108.88(3) |
|  |            |           | Se3-Cu3-I4   | 112.80(4) |
|  |            |           | Se3-Cu3-I3   | 100.81(3) |
|  |            |           | I4-Cu3-I3    | 111.04(3) |
|  |            |           | Se3-Cu3-I1   | 109.89(3) |
|  |            |           | I4-Cu3-I1    | 113.99(3) |
|  |            |           | I3-Cu3-I1    | 107.39(3) |
|  |            |           | Se4#2-Cu4-I2 | 112.31(4) |
|  |            |           | Se4#2-Cu4-I4 | 109.24(4) |
|  |            |           | I2-Cu4-I4    | 108.88(3) |
|  |            |           | Se4#2-Cu4-I3 | 104.63(4) |
|  |            |           | I2-Cu4-I3    | 114.12(3) |
|  |            |           | I4-Cu4-I3    | 107.43(3) |

184
